# Supplementary material for: Branching phenomena in nanostructure synthesis illuminated by the study of Ni-based nanocomposites
Source: Royal Society of Chemistry journal article supplement (doi:10.1039/d2sc05077c), 2022-12-26
Supplement: d2sc05077c2.xlsx [file d2sc05077c2.xlsx]

## Sheet: Sheet1
#	# in Figure 1	React. [min]	React. Temp. [°C]	Ramp [°C/min]	Ni(acac)2 [mmol]	1,2-tetradecanediol [mmol]	Dodecylamine [mmol]	Trioctylphosphine [mmol]	Oleylamine [mmol]	Oleic Acid [mmol]	1-octadecene [mL]
1	A	90	280	5.26	1		20		3.04	7.93	18
2	B	90	280	5.26	1				3.04	7.93	18
3	C	90	280	5.26	1	10			3.04	4.76	18
4	D	90	280	5.26	1			2.24	3.04		18
5	E	90	280	3.42	1			2.24	3.04	7.93	15
6	F	90	280	5.26	1		60		3.04	7.93	18
7	G	90	280	3.42	1		60		3.04	7.93	18
8	H	120	280	5.26	1	10			3.04	9.52	19.5
9	I	90	280	3.42	1		20		3.04	7.93	15
10	J	90	280	5.26	1		50		3.04	7.93	18
11	K	90	280	3.42	1		50		3.04	7.93	18
12	L	90	280	3.42	1	10			3.04	9.52	19.5
13	M	90	280	3.42	1		20		3.04	7.93	18
14	N	90	280	5.26	1	10			3.04	3.21	18
15	O	90	280	3.42	1	10			3.04	3.21	18
16	P	90	280	3.42	1	10			3.04	11.89	30
17	Q	90	280	3.42	1		20		3.04	7.93	20
18	R	90	280	5.26	1	10			3.04	7.93	25
19	S	90	280	3.42	1	10			3.04	7.93	19.5
20	T	90	280	3.42	1	10			3.04	9.52	30
21	U	90	280	3.42	1		20		7.6	7.93	18
22	V	90	280	5.26	1	10			3.04	7.93	30
23	W	90	280	3.42	1	10			3.04	7.93	30
24	X	90	280	3.42	1	10			3.04	7.93	35
